# Supplementary material for: Nucleosome Assembly Protein 1, Nap1, Is Required for the Growth, Development, and Pathogenicity of Magnaporthe oryzae
Source: MDPI journal article supplement (doi:10.3390/ijms23147662), 2022-07-11
Supplement: s1 [file s1]

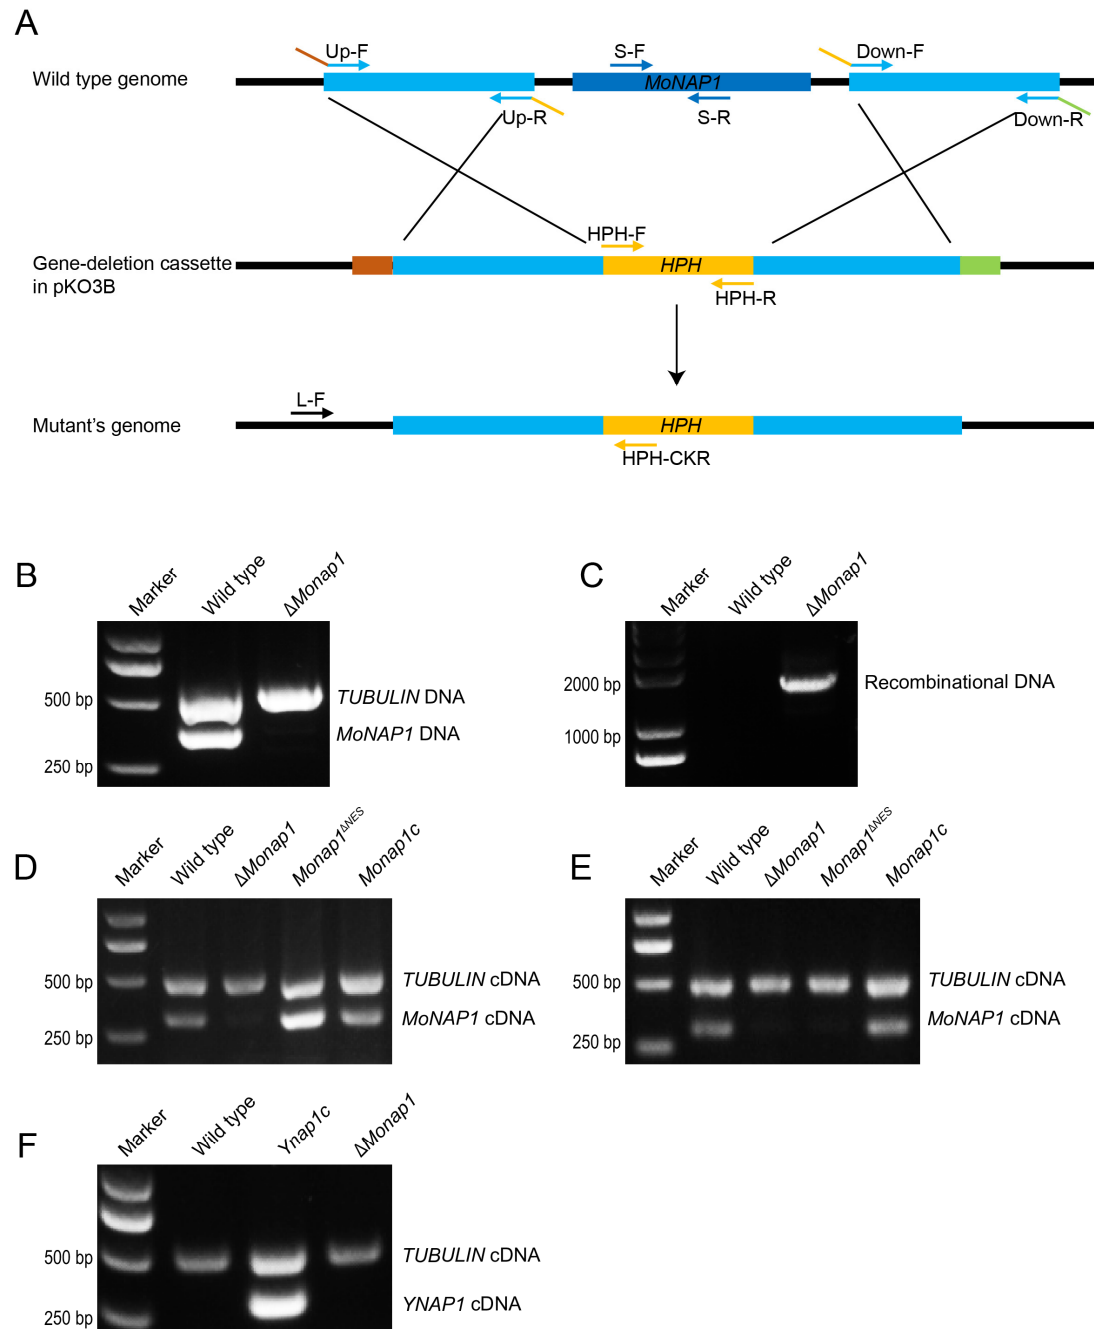

**Figure S1.** Knockout and complementation of *NAP1* in *Magnaporthe oryzae* strain 70-15. **(a)** Targeted gene deletion strategy. Two pairs of primers (Up-F/Up-R and Down-F/Down-R) were used to clone the respective left and right flanking fragments of the targeted genes. The primer set S-F/S-R was used to clone a fragment of the targeted deletion gene in transformants. The primer set L-F/HPH-CKR was used to clone the recombinational DNA fragments in mutants. **(b)** *MoNAP1* deletion events in wild-type 70-15 were confirmed at the DNA level by double PCRs of both *MoNAP1* (amplified by primers S-F/S-R) and the positive control of  $\beta$ -*TUBULIN* DNA (amplified by primers Tbl-gF/Tbl-gR). **(c)** Recombinational DNA

was confirmed at the DNA level by positive PCR using the primer set L-F/HPH-CKR. (d) Complementation of  $\Delta Monap1$  by *MoNAP1* (*Monap1c*). Complemented *MoNAP1* was confirmed at the RNA level by RT-PCR using  $\beta$ -*TUBULIN* as a control. The primer set cNAP1-F/cNAP1-R was used to clone a fragment of the complemented gene in the transformants. (e) Complementation of  $\Delta Monap1$  by *MoNAP1* without the NES sequence (*Monap1<sup>ΔNES</sup>*). The primer set cNAP1<sup>ΔNES</sup>-F/cNAP1<sup>ΔNES</sup>-R was used to verify the deletion of the NES sequence at the RNA level, where a fragment could be cloned in the wild type, but no fragment was cloned in *Monap1<sup>ΔNES</sup>*. (f) Complementation of  $\Delta Monap1$  with the *NAP1* gene of *S. cerevisiae* (*Ynap1c*). Complemented *YNAP1* was confirmed at the RNA level by RT-PCR using  $\beta$ -*TUBULIN* as a control. The primer set cNAP1y-F/cNAP1y-R was used to clone the *NAP1* gene of *S. cerevisiae*.

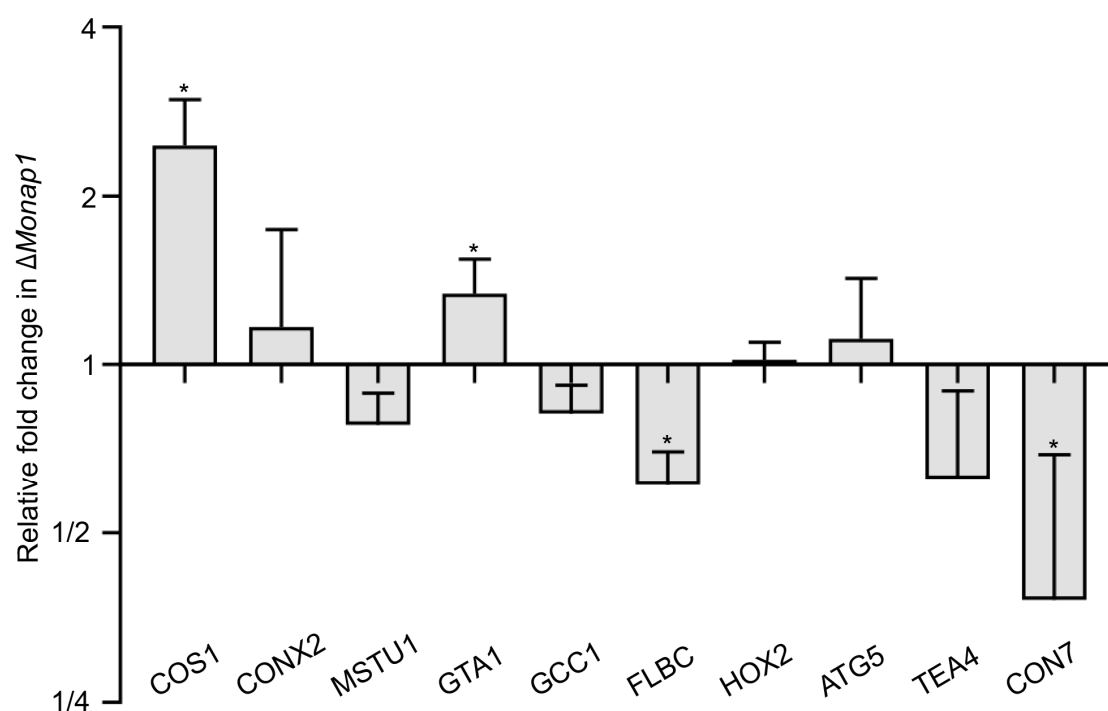

**Figure S2.** Expression levels of the conidiation-related genes *COS1*, *CONX2*, *MSTU1*, *GTA1*, *GCC1*, *FLBC*, *HOX2*, *CON7*, *TEA4*, and *ATG5* in  $\Delta Monap1$ . Error bars represent the standard deviations. The data were analyzed by GraphPad Prism 8.0 and significant differences compared with the wild type were estimated by multiple t tests: \*  $p < 0.05$ .

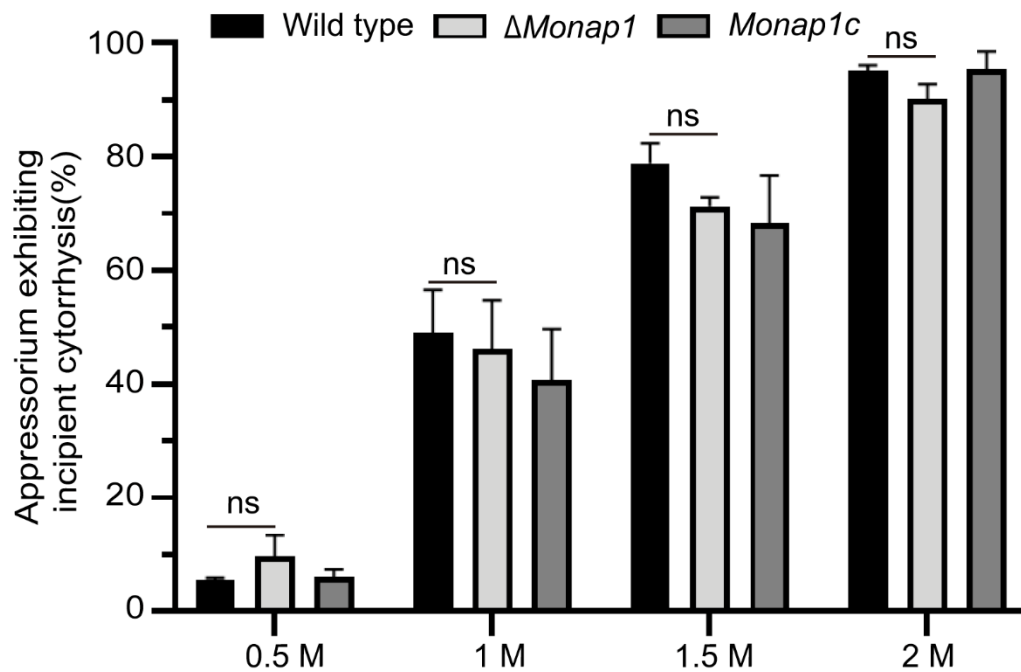

**Figure S3.** Collapsed appressoria rates (%) of the wild-type,  $\Delta Monap1$ , and *MoNAP1* complemented strains of  $\Delta Monap1$  (*Monap1c*). At least 150 spores were counted per replicate.  $n = 3$  independent biological replicates. Error bars represent the standard deviations. The data were analyzed by GraphPad Prism 8.0 and significant differences compared with the wild type were estimated by multiple t tests: ns,  $p > 0.05$ .

**Table S1.** Copy number identification of the selectable marker gene *HPH* inserted in the genome of  $\Delta Monap1$ .

| Gene          | Gene<br>(MG8) | locus | Parent<br>strain | Recombination<br>resistance<br>gene | Knockout <sup>a</sup> | Copies of <i>HPH</i><br>by qPCR <sup>b</sup> | Insertion<br>event <sup>c</sup> |
|---------------|---------------|-------|------------------|-------------------------------------|-----------------------|----------------------------------------------|---------------------------------|
| <i>MoNAP1</i> | MGG_06924     | 70-15 |                  | <i>HPH</i>                          | Y                     | 0.99                                         | Single                          |

Notes:

a "Y" and "N" represent the target gene deleted or undeleted, respectively.

b The copy number of the selectable marker gene (*HPH*) in the genome of the mutants identified by qPCR after normalized with  $\beta$ -tubulin gene and the wild type strain.

c "Single" represents the targeted gene deletion without ectopic insertion.

**Table S2.** Primers used in this study

|                                                                                                                                 |  |                                                            |
|---------------------------------------------------------------------------------------------------------------------------------|--|------------------------------------------------------------|
| 1 Primers used to build gene deletion cassettes                                                                                 |  |                                                            |
| Up-F                                                                                                                            |  | GCCCCGGGAGATGGGGGAGGCTAACTGACACTCTAGATACTCGAGGTCTACC       |
| Up-R                                                                                                                            |  | AAAATAGGCATTCATTGTTGACCTCCACTA TGCTGCATGGCGTGATT           |
| Down-F                                                                                                                          |  | CCCAGCACTCGTCCGAGGGCAAAGGAATAGGTGACGGTGCTAGTCTGTTT         |
| Down-R                                                                                                                          |  | TCACGACGTTGTAAAACGACGGCCAGTGCCAAGCTTGTTTGCTCAGTCCATTGTTATG |
| HPH-F                                                                                                                           |  | TAGTGGAGGTCAACAATGAATG                                     |
| HPH-R                                                                                                                           |  | CATCTACTCTATTCTTTGCC                                       |
| 2 Primers used to identify $\Delta Monap1$ , <i>Monap1c</i> , <i>Monap1</i> <sup><math>\Delta</math>NES</sup> and <i>Ynap1c</i> |  |                                                            |
| S-F                                                                                                                             |  | CATCGTCATCGTCCTCATCTT                                      |
| S-R                                                                                                                             |  | GAGCAGAAGAAACAGCGAAAC                                      |
| L-F                                                                                                                             |  | AGACAGCAATTCCATGACG                                        |
| HPH-CKR                                                                                                                         |  | GGCTGATCTGACCAGTTGCCT                                      |
| Tbl-gF                                                                                                                          |  | TTCCGCGCTGTCACCGTTCC                                       |
| Tbl-gR                                                                                                                          |  | GGGCCTCCTCCTCGTACTCCTCTT                                   |
| cNAP1-F                                                                                                                         |  | GAAGAAGGAGGTCAAGACTGAAG                                    |
| cNAP1-R                                                                                                                         |  | CGGCATGGTCGTAGATGAA                                        |
| qtub-F                                                                                                                          |  | ATTGTTACCTTCAGACCGG                                        |
| qtub-R                                                                                                                          |  | TTGAAGTAGACGCTCATAACG                                      |
| qHPH-F                                                                                                                          |  | ATGTCCTGCGGGTAAATAGC                                       |
| qHPH-R                                                                                                                          |  | GATGCAATAGGTCAGGCTCTC                                      |
| cNAP1 <sup><math>\Delta</math>NES</sup> -F                                                                                      |  | AAGTGAAGCGCCGAGTGGCTG                                      |
| cNAP1 <sup><math>\Delta</math>NES</sup> -R                                                                                      |  | GGCCAGGGAAATTTGGTTCTTC                                     |
| cNAP1y-F                                                                                                                        |  | CGCAAAGGGCCAAGAGATTG                                       |
| cNAP1y-R                                                                                                                        |  | TGGGTTGGCGGAAGAATCAA                                       |
| 3 Primers used in the complementation experiments                                                                               |  |                                                            |
| NAP1c-F                                                                                                                         |  | TCACCGAGATTTAGGAATTCGCCAGCGACAACTCAA                       |
| NAP1c-R                                                                                                                         |  | TACTGCAGGTCGACTCTAGAACAGAATACTGCAGGATCAAAC                 |
| NAP1 <sup><math>\Delta</math>NES</sup> -F1                                                                                      |  | TCAATCACAATGGCCGGATCCATGGCCGAGCCCATTCCC                    |
| NAP1 <sup><math>\Delta</math>NES</sup> -R1                                                                                      |  | TCAAGTTTGGAGTGCTCCTTTGACTCGATGTAGCCAGAAG                   |
| NAP1 <sup><math>\Delta</math>NES</sup> -F2                                                                                      |  | AAGGAGCACTCCAACTTGA                                        |
| NAP1 <sup><math>\Delta</math>NES</sup> -R2                                                                                      |  | TACTGCAGGTCGACTCTAGACTAGCTCTGCTTGCACTCGG                   |
| yNAP1-F                                                                                                                         |  | TCAATCACAATGGCCGGATCCATGTCAGACCCTATCAGAACGAAAC             |
| yNAP1-R                                                                                                                         |  | TTACTGCAGGTCGACTCTAGAGGTGGCATTGCCCAAGTCC                   |
| 4 Primers used to construct NAP1-GFP and NAP1 <sup><math>\Delta</math>NES</sup> -GFP plasmid                                    |  |                                                            |
| NAP1-GFP-F                                                                                                                      |  | CAATCACAATGGCC GGATCC ATGGCCGAGCCCATTCCC                   |
| NAP1-GFP-R                                                                                                                      |  | CCCTTGCTCACCATCCCGGGGCTCTGCTTGCACTCGGC                     |
| NAP1 <sup><math>\Delta</math>NES</sup> -GFP-F1                                                                                  |  | ACGAGCTGTACAAGTCTAGAATGGCCGAGCCCATTCCC                     |
| NAP1 <sup><math>\Delta</math>NES</sup> -GFP-R1                                                                                  |  | TCAAGTTTGGAGTGCTCCTTTGACTCGATGTAGCCAGAAG                   |
| NAP1 <sup><math>\Delta</math>NES</sup> -GFP-F2                                                                                  |  | AAGGAGCACTCCAACTTGA                                        |

---

NAP1<sup>ΔNES</sup>-GFP-R2 TACTGCAGGTCGACTCTAGACTAGCTCTGCTTGCACTCGG

---

5 Primers used in BiFC and pull-down assays

---

|                                        |                                              |
|----------------------------------------|----------------------------------------------|
| NAP1- YFP <sup>CTF</sup> -F            | CAAACCATAAAAATGGGATCCATGGCCGAGCCCATTCCC      |
| NAP1- YFP <sup>CTF</sup> -R            | CTTGCAGGCCGGGCGCCCCGGGGCTCTGCTTGCACTCGGCG    |
| H <sub>2</sub> A-YFP <sup>NTE</sup> -F | AGAAAGGTATCTAGAGTCGACATGACTGGAGGCGGCAAGTCCGG |
| H <sub>2</sub> A-YFP <sup>NTE</sup> -R | TGTCGCTTACTGCAGGTCGACCATCTCTTGGCTGGCGTTCTT   |
| FLAG-NAP1-F                            | ATGATGACGACAAGGTCGACATGGCCGAGCCCATTCCCAA     |
| FLAG-NAP1-R                            | TCGAGTGCGGCCGCAAGCTTGCTCTGCTTGCACTCGGCGG     |
| GST-H <sub>2</sub> A-F                 | CGCGTGGATCCCCGGAATTCATGACTGGAGGCGGCAAGTC     |
| GST-H <sub>2</sub> A-R                 | TCGAGTCGACCCGGAATTCCATCTCTTGGCTGGCGTTCT      |
| GST-H <sub>2</sub> B-F                 | CGCGTGGATCCCCGGAATTCATGCCCCCAAGGCCGCTGA      |
| GST-H <sub>2</sub> B-R                 | TCGAGTCGACCCGGAATTCTTTGGTGCTTGAAGAGTACT      |
| GST-CYC1-F                             | CGCGTGGATCCCCGGAATTCCCCCAGCCCGGACTGCGC       |
| GST-CYC1-R                             | TCGAGTCGACCCGGAATTCAGCTGGTCGATAGCTACG        |

---

6 Primers used in qPCR

---

|          |                       |
|----------|-----------------------|
| COS1-qF  | CACAACCATTCAAAGACGCAC |
| COS1-qR  | AGAGTTGACTTTGGCGATGAG |
| CONX2-qF | GCCCGAGAGCAAGAGTAATAC |
| CONX2-qR | CTGCTTCATGTACGGGTAGTC |
| MSTU1-qF | GATCAGGGTCACAATAACGGG |
| MSTU1-qR | ACTAGAGATGGACGAGACAGG |
| GTA1-qF  | AAGACATCCACGACCAGTTC  |
| GTA1-qR  | GTAACGTGGTTCCTGGTAGC  |
| GCC1-qF  | CCAAGTTTGAAAGCTCCGAG  |
| GCC1-qR  | GTGAACAAAGGGCAAGGAAG  |
| FLBC-qF  | TCCCTCAACTACGACCCTTAC |
| FLBC-qR  | GTGAGCTGCCAGAGTAGATAC |
| HOX2-qF  | GGACTGCCTCTCAATGGTATG |
| HOX2-qR  | AGGTGTGGGAGCAATTATCG  |
| ATG5-qF  | GGGTCTTTTAGGGTCATGCAG |
| ATG5-qR  | AGCAAGTCACGTAGTGTGG   |
| TEA4-qF  | AGCACATTGAGACACCCAC   |
| TEA4-qR  | GGCTACAGTCTTGGTCTTCC  |
| CON7-qF  | ACCATTAAACGCGCATGTG   |
| CON7-qR  | CGTTCCTCGTCTGCCTTG    |

---
